# Supplementary material
Source: Research Square preprint supplement (doi:10.21203/rs.3.rs-10325306/v1)

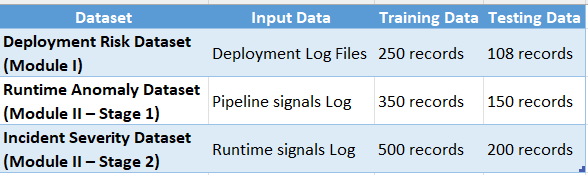


Table 1. Details of the dataset

Supplement: Supplementary file 1 [file 6b6d5b805ebebb0bd5a245d4.docx]
